# Supplementary material for: Should We Open Fire on Microglia? Depletion Models as Tools to Elucidate Microglial Role in Health and Alzheimer’s Disease
Source: Int J Mol Sci. 2021 Sep 8;22(18):9734. doi: 10.3390/ijms22189734 (PMC8471219; doi:10.3390/ijms22189734)
Supplement: Supplementary file 1 [file ijms-22-09734-s001.zip › ijms-1336685-supplementary.pdf]

# Supplementary Materials

**Table S1.** Antibodies and Taqman Gene Expression assay probes (Applied Biosystems) used. Flow cytometry analysis was developed as described in March-Diaz et al., 2021 [18]. Immunohistochemistry and qPCR was performed as described in Romero-Molina et al., 2018 [20].

|                                    | Antibody     | Clonality                | Vendor           | Dilution |
|------------------------------------|--------------|--------------------------|------------------|----------|
| Flow cytometry                     | Anti-CD45-PE | Monoclonal (Clone HI30)  | Immunostep       | 1/33     |
|                                    | Anti-CD11b   | Monoclonal (Clone M1/70) | Immunostep       | 1/33     |
| Immunohistochemistry               | Anti-Iba1    | Polyclonal (#234 003)    | Synaptic Systems | 1/1000   |
| Taqman Gene Expression Assay Probe |              |                          | Reference        |          |
| qPCR                               |              | <i>Cd163</i>             | Mm00474091_m1    |          |
|                                    |              | <i>Cd3</i>               | Mm01179194_m1    |          |
|                                    |              | <i>Cd45</i>              | Mm01293577_m1    |          |
|                                    |              | <i>Ccr2</i>              | Mm00801681_m1    |          |
|                                    |              | <i>Clec7a</i>            | Mm01183349_m1    |          |
|                                    |              | <i>Ki67</i>              | Mm01278617_m1    |          |
|                                    |              | <i>Lgals3</i>            | Mm00802901_m1    |          |
|                                    |              | <i>Ly6c</i>              | Mm00841873_m1    |          |
|                                    |              | <i>Trem2</i>             | Mm04209424_g1    |          |
